# Supplementary material for: Stiffer Matrix Accelerates Migration of Hepatocellular Carcinoma Cells through Enhanced Aerobic Glycolysis Via the MAPK-YAP Signaling
Source: PubMed Central journal article supplement (PMC7072284; doi:10.3390/cancers12020490), 2020-02-19
Supplement: cancers-12-00490-s001.pdf [file cancers-12-00490-s001.pdf]

Article

# Stiffer Matrix Accelerates Migration of Hepatocellular Carcinoma Cells through Enhanced Aerobic Glycolysis Via the MAPK-YAP Signaling

Qiu-Ping Liu <sup>1</sup>, Qing Luo <sup>1</sup>, Bin Deng <sup>1</sup>, Yang Ju <sup>2</sup> and Guan-Bin Song <sup>1,\*</sup>

<sup>1</sup> Key Laboratory of Biorheological Science and Technology, Ministry of Education, College of Bioengineering, Chongqing University, Chongqing 400030, China; liuqp@cqu.edu.cn (Q.-P.L.); qing.luo@cqu.edu.cn (Q.L.); dengbin2018@cqu.edu.cn (B.D.)

<sup>2</sup> Department of Mechanical Science and Engineering, Nagoya University, Nagoya 464-8603, Japan; ju@mech.nagoya-u.ac.jp

\* Correspondence: song9973@163.com; Tel./Fax: +86-23-65102507

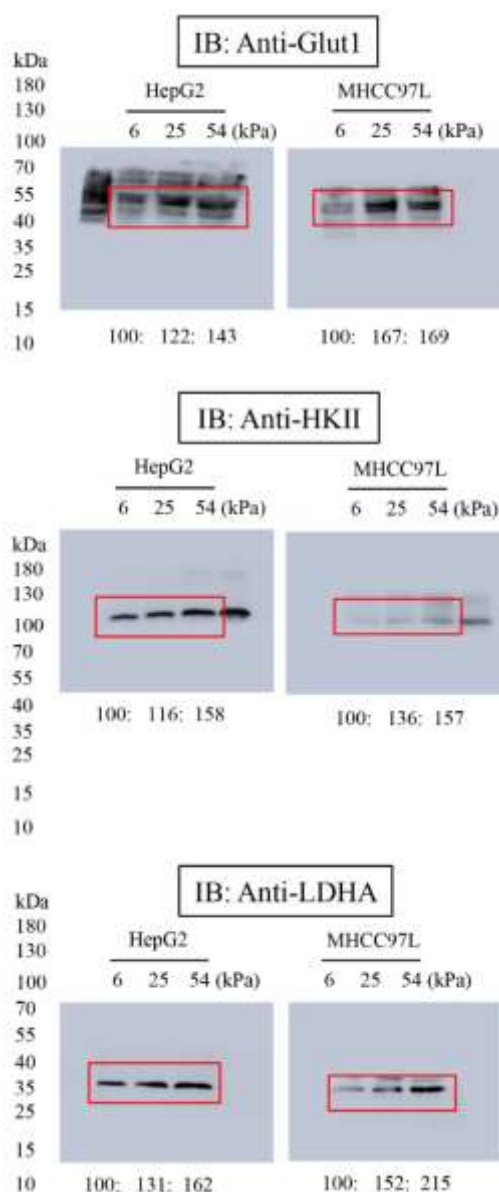

Figure S1: Original western blots of Figure 2b.

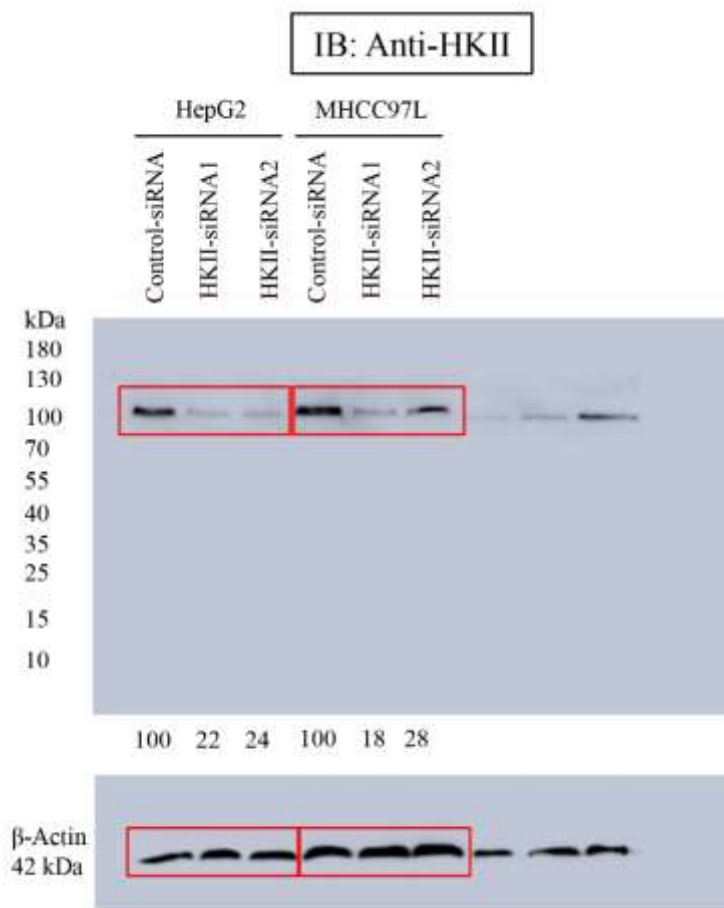

**Figure S2:** Original western blots of Figure 3a.

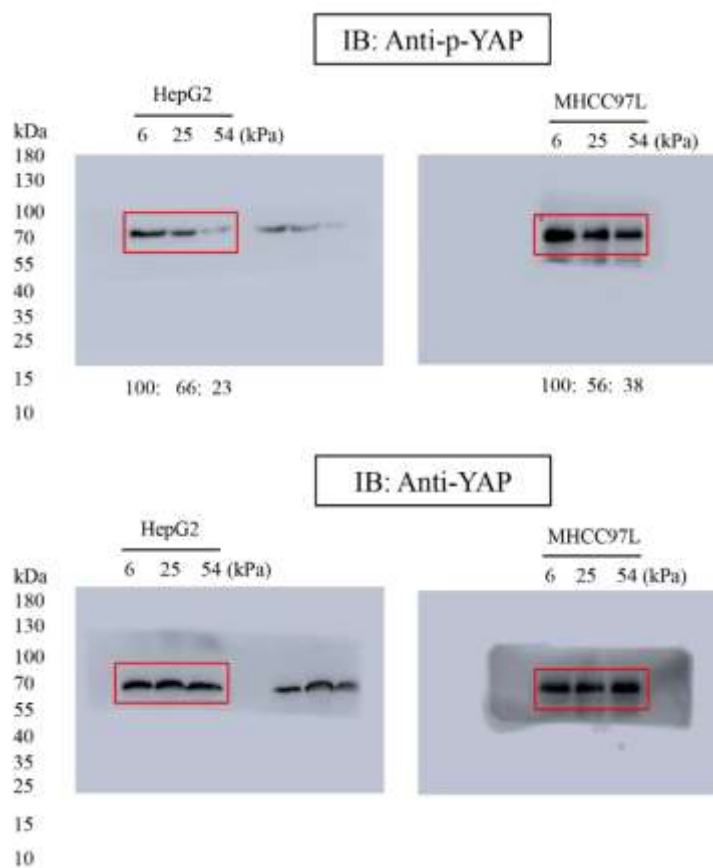

Figure S3: Original western blots of Figure 4a.

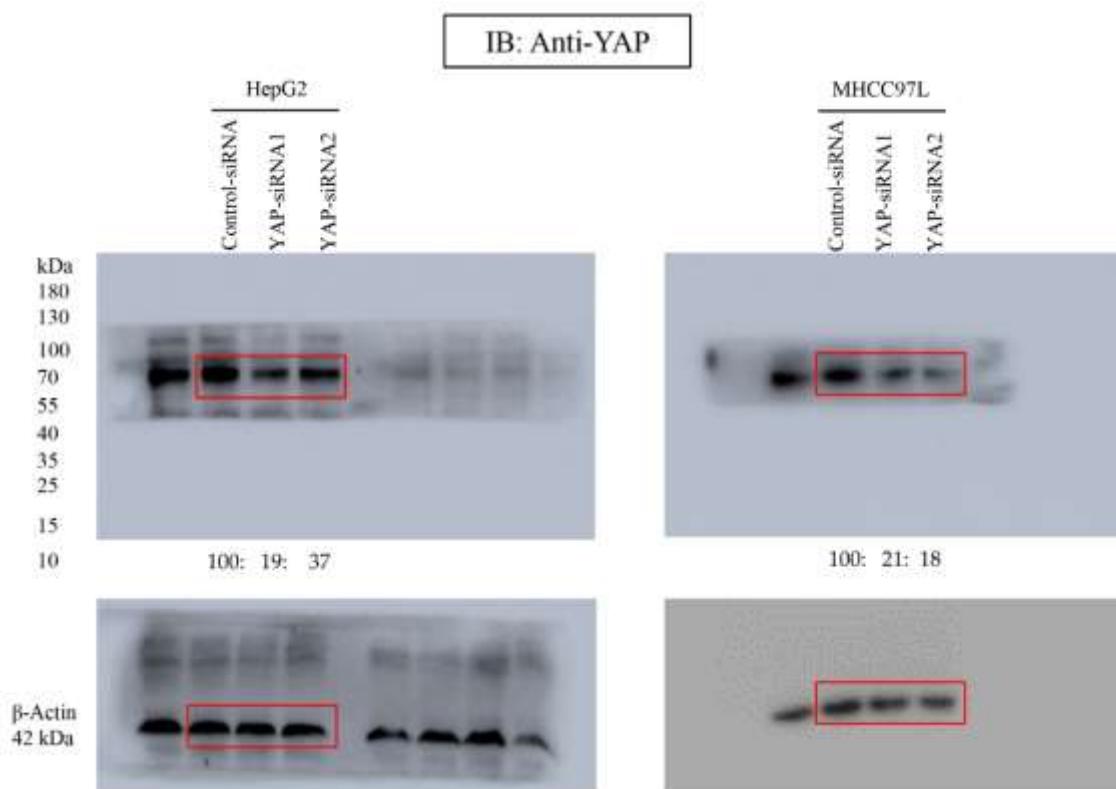

Figure S4: Original western blots of Figure 5a.

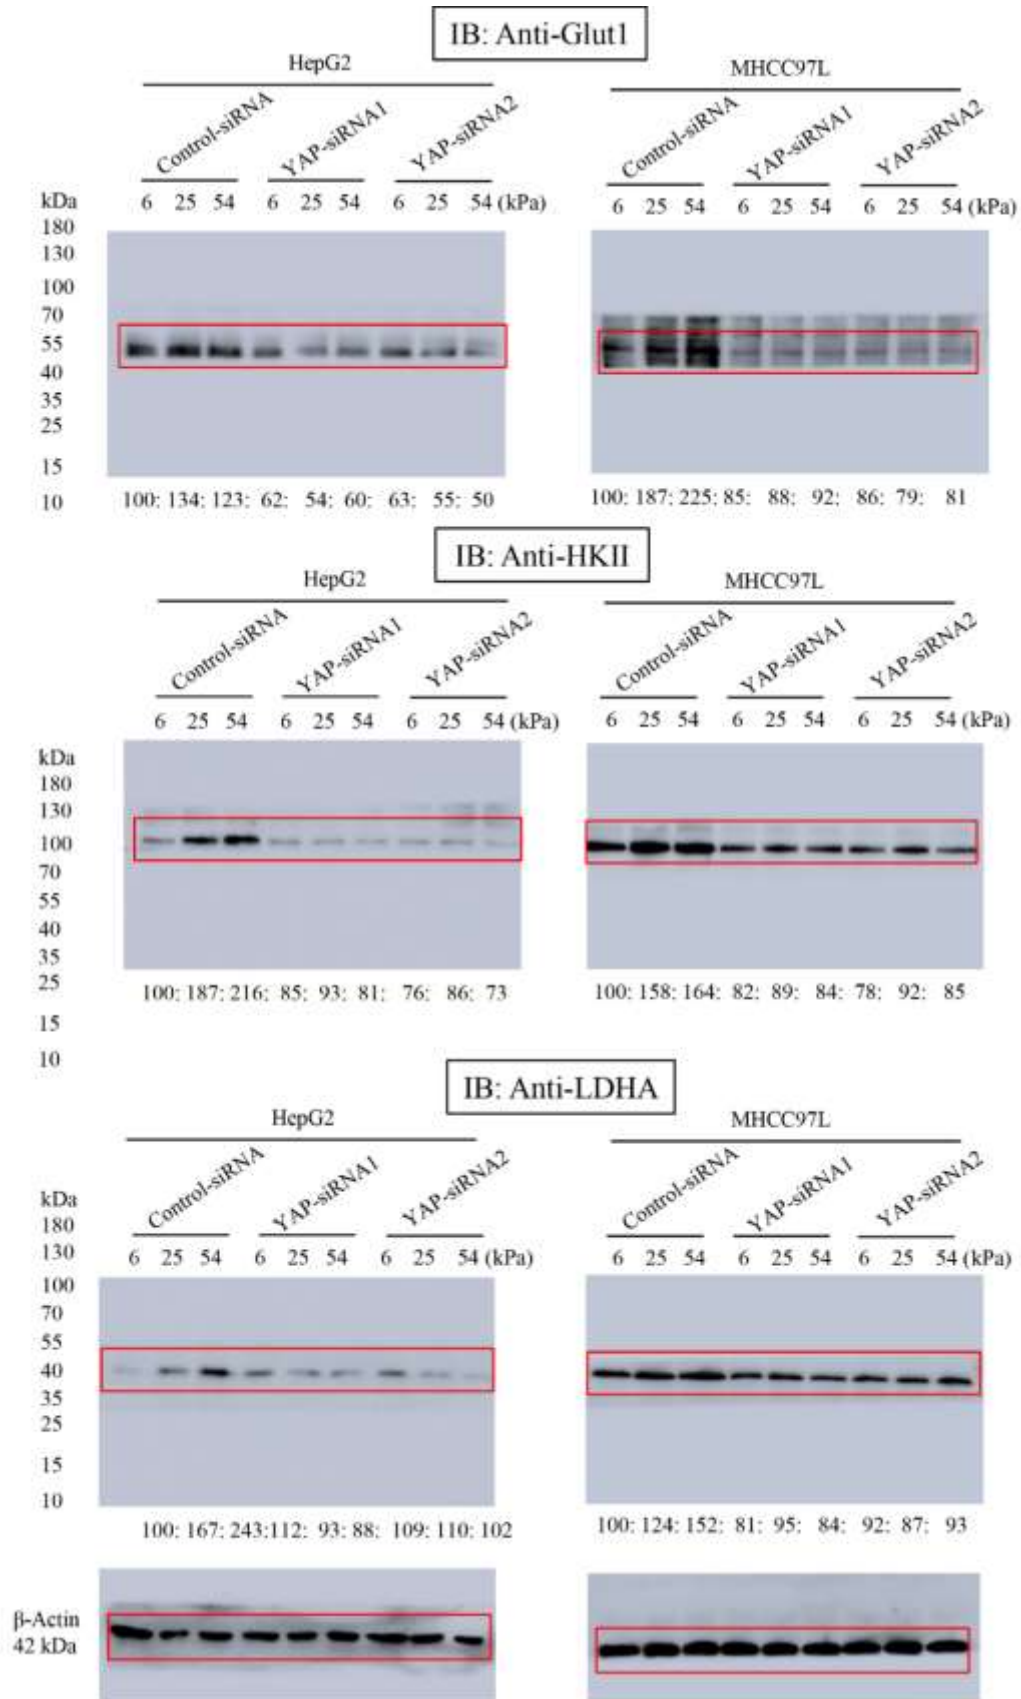

Figure S5: Original western blots of Figure 5c.

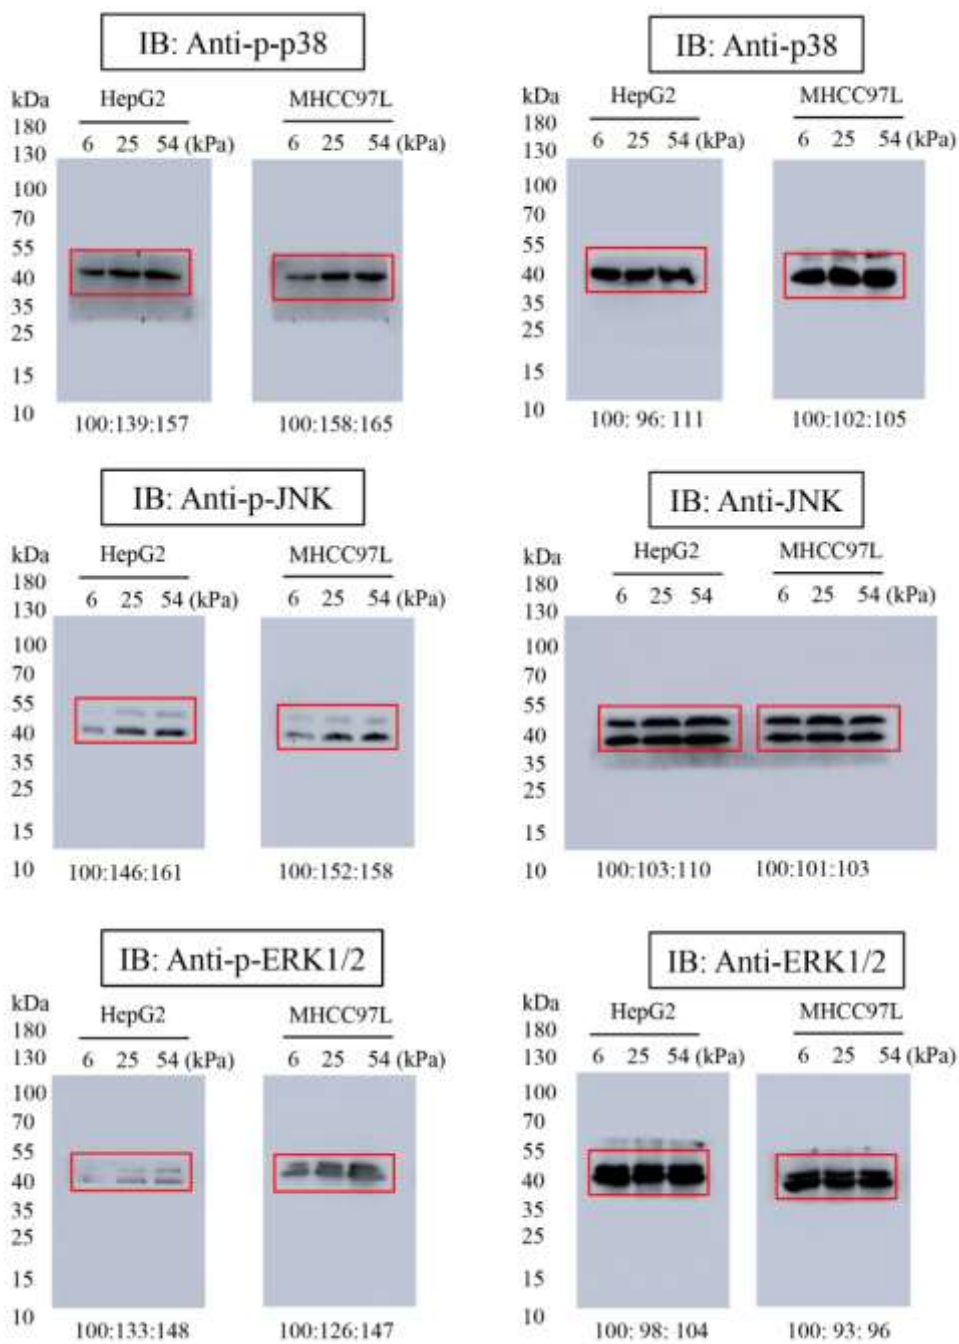

Figure S6: Original western blots of Figure 6a.

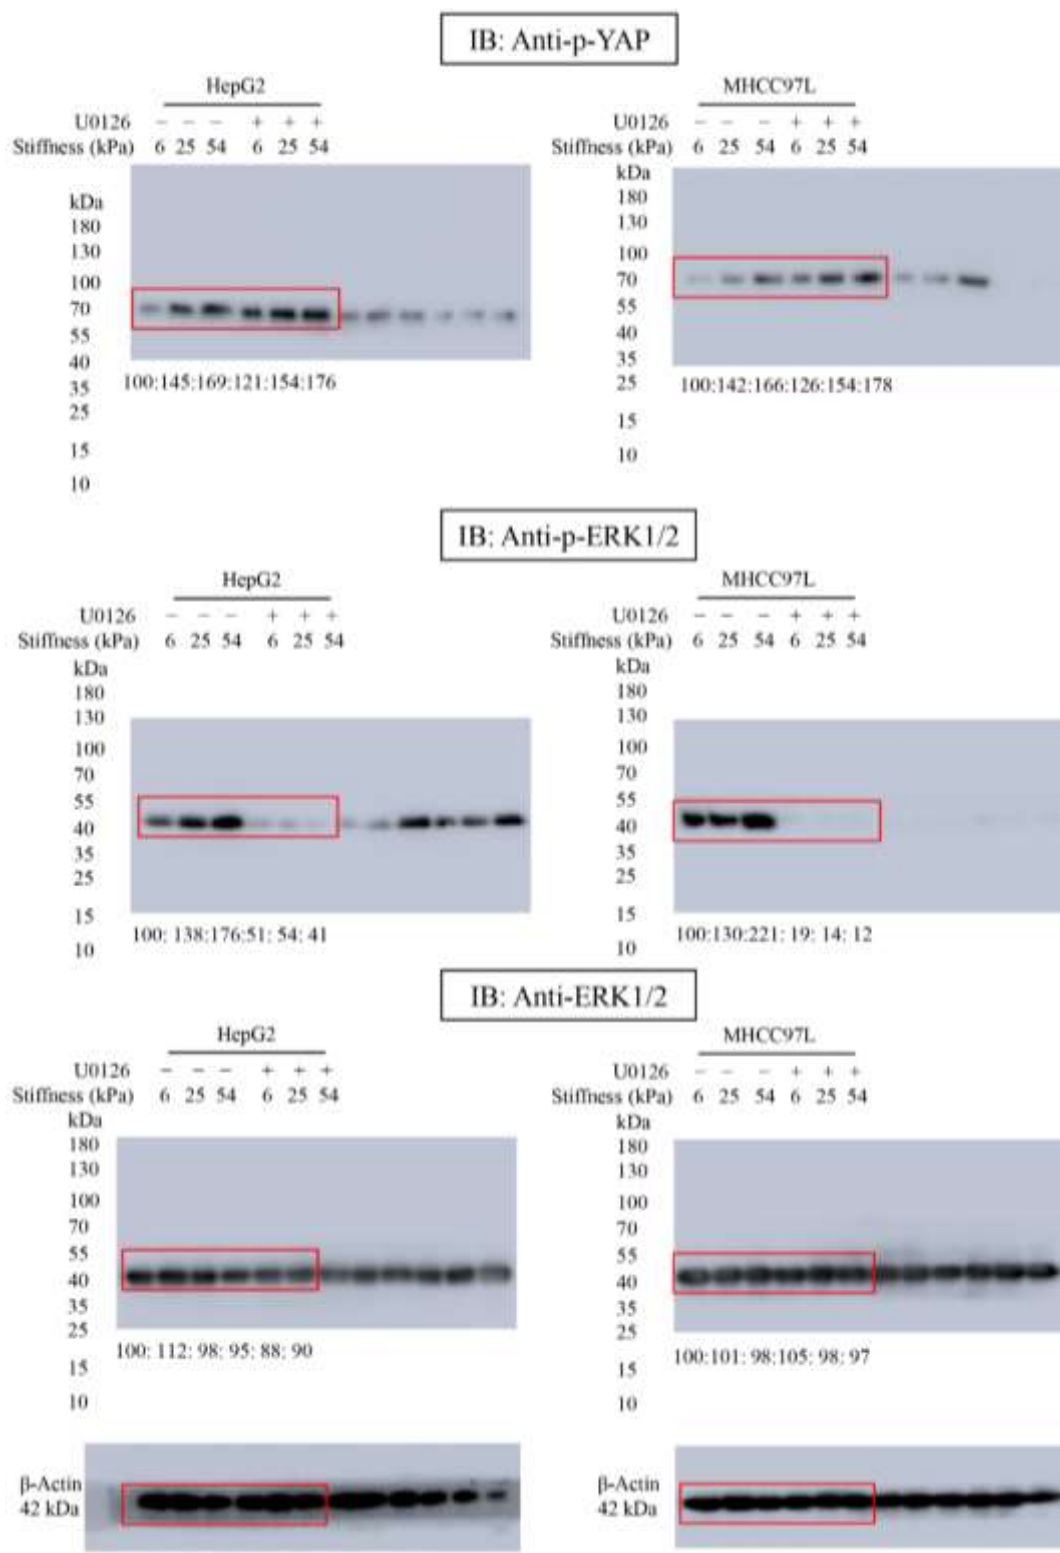

Figure S7: Original western blots of Figure 6b.

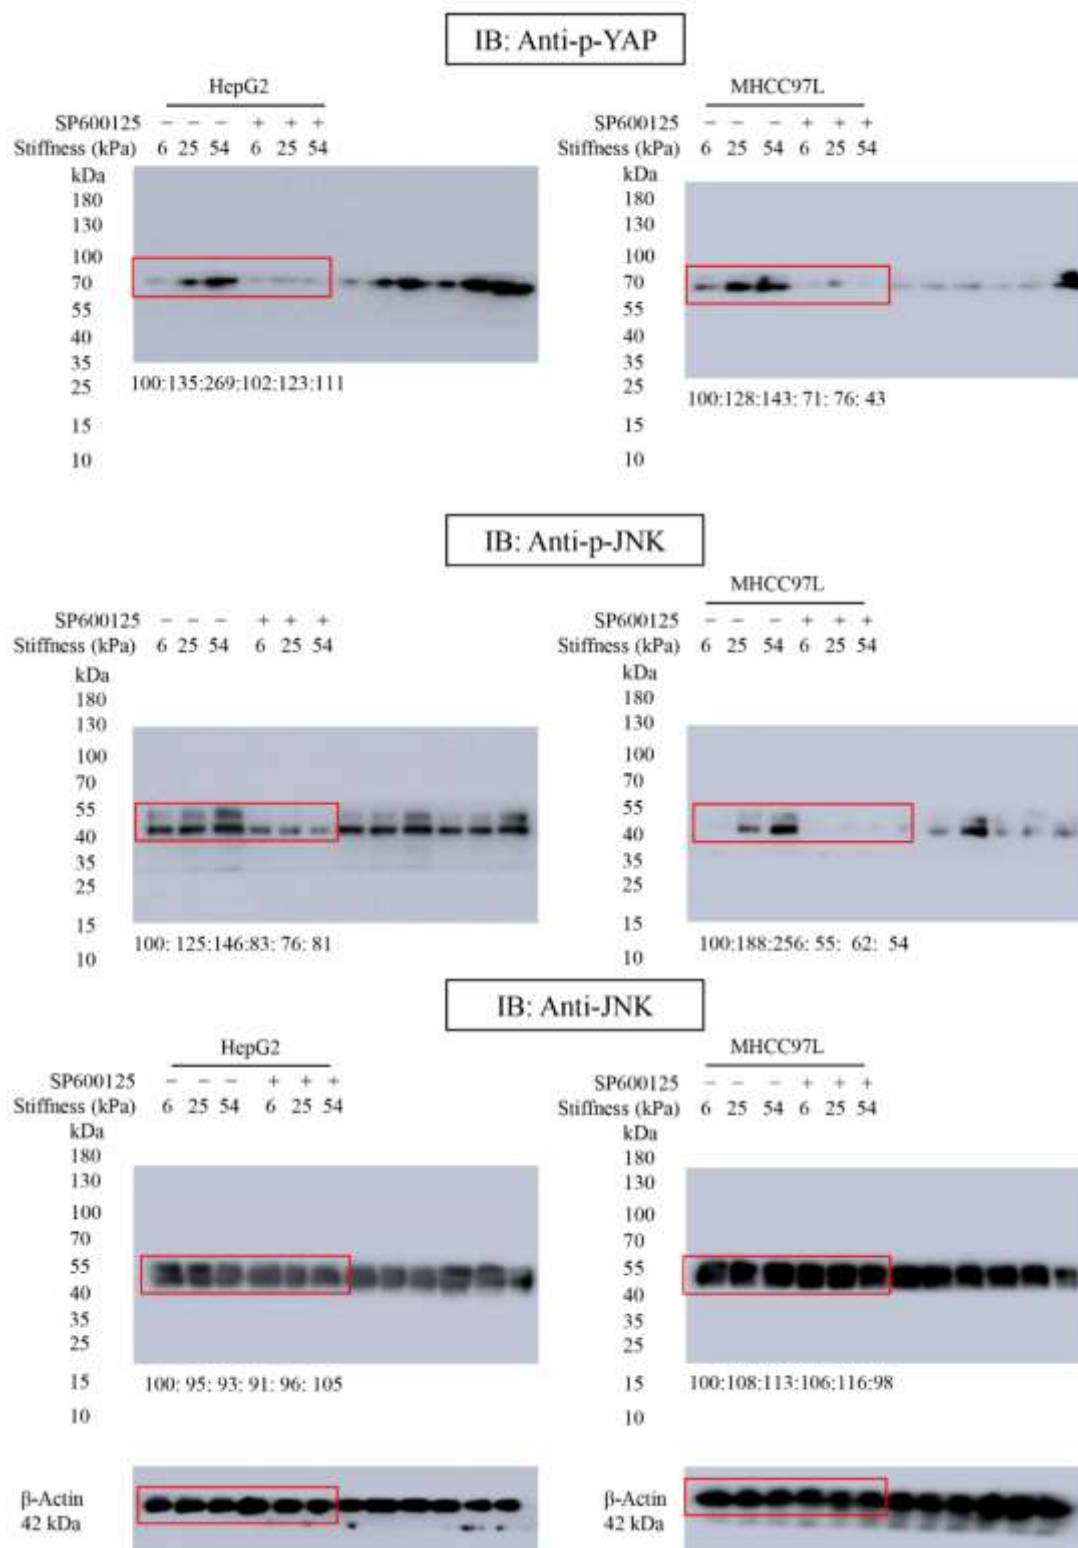

Figure S8: Original western blots of Figure 6c.



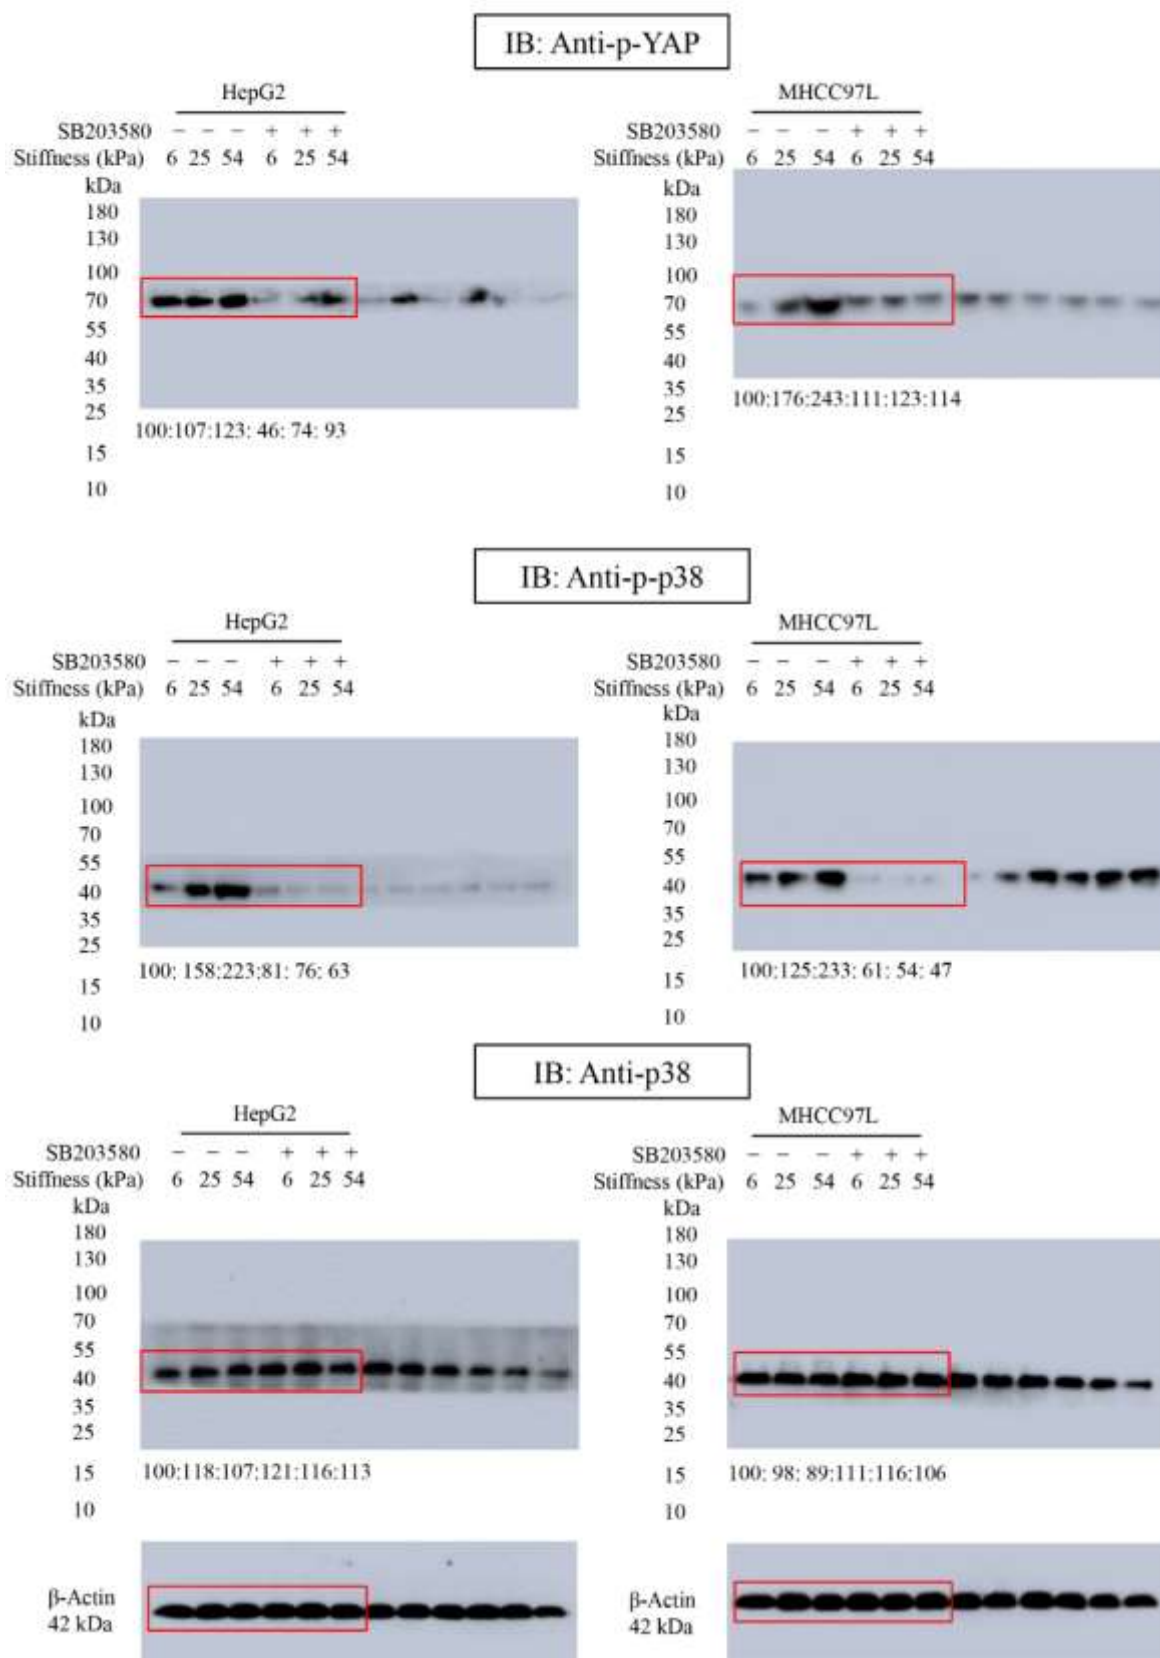

Figure S9: Original western blots of Figure 6d.



**Table 1.** The list of primers.

| Target genes   | Name    | Primer sequences (5'-3') |
|----------------|---------|--------------------------|
| Glut1          | Forward | AACTCTTCAGCCAGGGTCCAC    |
|                | Reverse | CACAGTGAAGATGATGAAGAC    |
| HK2            | Forward | TGGAGGGACCAACTTCCGTGTGCT |
|                | Reverse | TCAAACAGCTGGGTGCCACTGC   |
| LDHA           | Forward | ATGGCAACTCTAAAGGATCAGC   |
|                | Reverse | CCAACCCCAACAACCTGTAATCT  |
| CYR61          | Forward | ACCGCTCTGAAGGGGATCT      |
|                | Reverse | ACTGATGTTTACAGTTGGGCTG   |
| CTGF           | Forward | AGGAGTGGGTGTGTGACGA      |
|                | Reverse | CCAGGCAGTTGGCTCTAATC     |
| $\beta$ -Actin | Forward | AAAGACCTGTACGCCAACAC     |
|                | Reverse | GTCATACTCCTGCTTGCTGAT    |

**Table 2.** The list of siRNAs.

| Target genes | Name                    | Sequences (5'-3')     |
|--------------|-------------------------|-----------------------|
| YAP          | YAP-siRNA1 sense        | GACAUCUUCUGGUCAGAGA   |
|              | YAP-siRNA1 antisense    | UCUCUGACCAGAAGAUGUC   |
|              | YAP-siRNA2 sense        | CUGGUCAGAGAUACUUCUU   |
|              | YAP-siRNA2 antisense    | AAGAAGUAUCUCUGACCAG   |
| HK II        | HK II -siRNA1 sense     | CACGAUGAAAUUGAACCUGGU |
|              | HK II -siRNA1 antisense | ACCAGGUUCAAUUCAUCGUG  |
|              | HK II -siRNA2 sense     | CCUGGGUGAGAUUGUCCGUAA |
|              | HK II -siRNA2 antisense | UUACGGACAAUCUCACCCAGG |
